# Supplementary material
Source: publisher figshare collection journal article supplement (https://acs.figshare.com/ndownloader/files/3959662)
Supplement: Supplementary file 1 [file 3959662]

# Environment-sensitive fluorescent supramolecular nanofibers for imaging applications

Yanbin Cai,<sup>†</sup> Yang Shi,<sup>†</sup> Huaimin Wang,<sup>†</sup> Jingyu Wang,<sup>†</sup> Dan Ding,<sup>†</sup> Ling Wang,<sup>\*,‡</sup> Zhimou Yang<sup>\*,†,‡</sup>

## Experimental supporting information

### Preparation of NBD-β-Alanine:

The preparation of NBD-β-Alanine was according to Scheme S-1. To a 15 mL water solution of 980 mg of β-Alanine (1.1 equiv.) and 4.14 g of K<sub>2</sub>CO<sub>3</sub> (3 equiv.), 2 g of NBD-Cl (1 equiv., 10 mmol) in 20 mL of MeOH was added dropwisely in the N<sub>2</sub> atmosphere (low yields if without nitrogen protection). The reaction mixture was stirred at room temperature for about 3h (LC-MS detection). After the 3h reaction, MeOH was removed by a rotary evaporator. The obtained aqueous solution was acidified to around pH 3 by conc. HCl. The acidic aqueous solution was then extracted by ether for 3 times. The combined organic solution was dried over MgSO<sub>4</sub> and then concentrated by a rotary evaporator. The resulting yellowish solid (NBD-β-Alanine) was directly used for solid phase peptide synthesis.

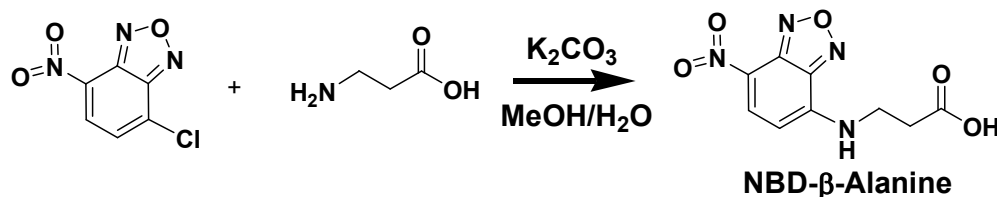

*Scheme S-1.* The synthetic route for NBD-β-Alanine

**Peptide synthesis:** The peptide derivative was prepared by solid phase peptide synthesis (SPPS) using 2-chlorotrityl chloride resin and the corresponding N-Fmoc protected amino acids with side chains properly protected by a tert-butyl group or Pbf group. 20% piperidine in anhydrous N,N'-dimethylformamide (DMF) was used during deprotection of Fmoc group. Then the next Fmoc-protected amino acid was coupled to the free amino group using O-(Benzotriazol-1-yl)-N,N,N',N'-tetramethyluroniumhexafluorophosphate (HBTU) as the coupling reagent. The growth of the peptide chain was according to the established Fmoc SPPS protocol. In the last coupling step, NBD-β-Alanine was used to produce NBD-peptides. After the last coupling step, excessive reagents were removed by a single DMF wash for 5 minutes (5 mL per gram of resin), followed by five steps of washing using DCM for 2 min (5 mL per gram of resin). The peptide derivative was cleaved using 95% of trifluoroacetic acid with 2.5% of trimethylsilane

(TMS) and 2.5% of H<sub>2</sub>O for 30 minutes. 20 mL per gram of resin of ice-cold diethylether was then added to cleavage reagent. The resulting precipitate was centrifuged for 10 min at 4 °C at 10,000 rpm. Afterward the supernatant was decanted and the resulting solid was dissolved in DMSO for HPLC separation using MeOH and H<sub>2</sub>O containing 0.05% of TFA as eluents.

### Characterization of the peptides

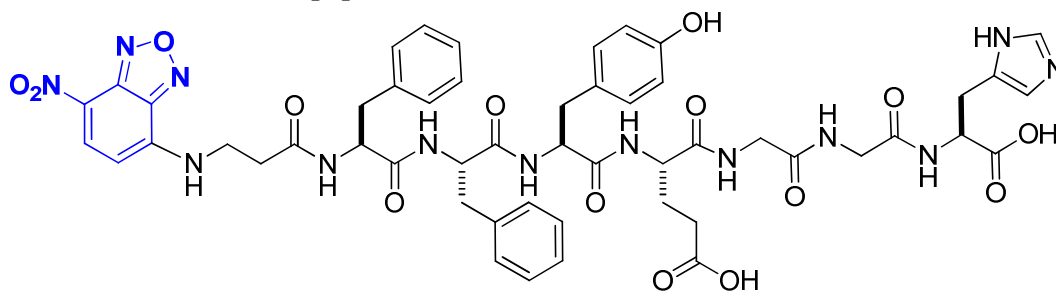

**Compound 1:** NBD-FFYEGGH

*Scheme S-2.* Chemical structure of NBD-FFYEGGH

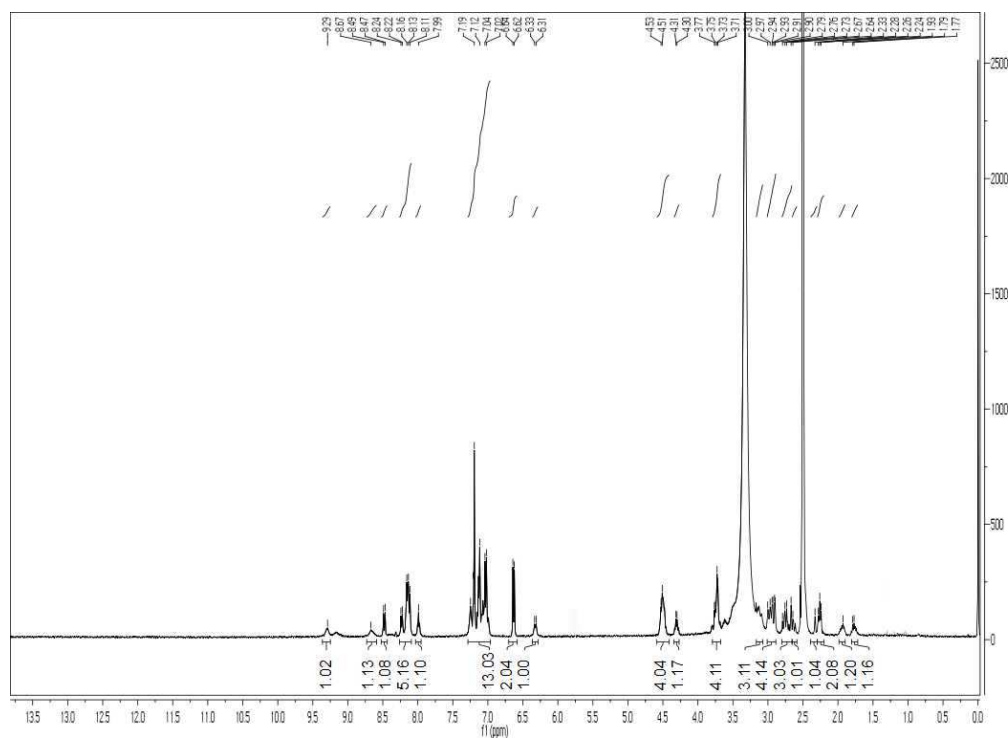

*Figure S-1.* <sup>1</sup>H-NMR of NBD-FFYEGGH

|               |         |             |           |                 |              |                        |                        |
|---------------|---------|-------------|-----------|-----------------|--------------|------------------------|------------------------|
| Sample Name   | ic/ms   | Position    | P1-A4     | Instrument Name | Instrument 1 | User Name              |                        |
| Inj Vol       | 2       | InjPosition |           | SampleType      | Sample       | IRM Calibration Status | Some Ions Missed       |
| Data Filename | CYB-2.d | ACQ Method  | chen-msum | Comment         |              | Acquired Time          | 10/18/2013 10:58:15 AM |

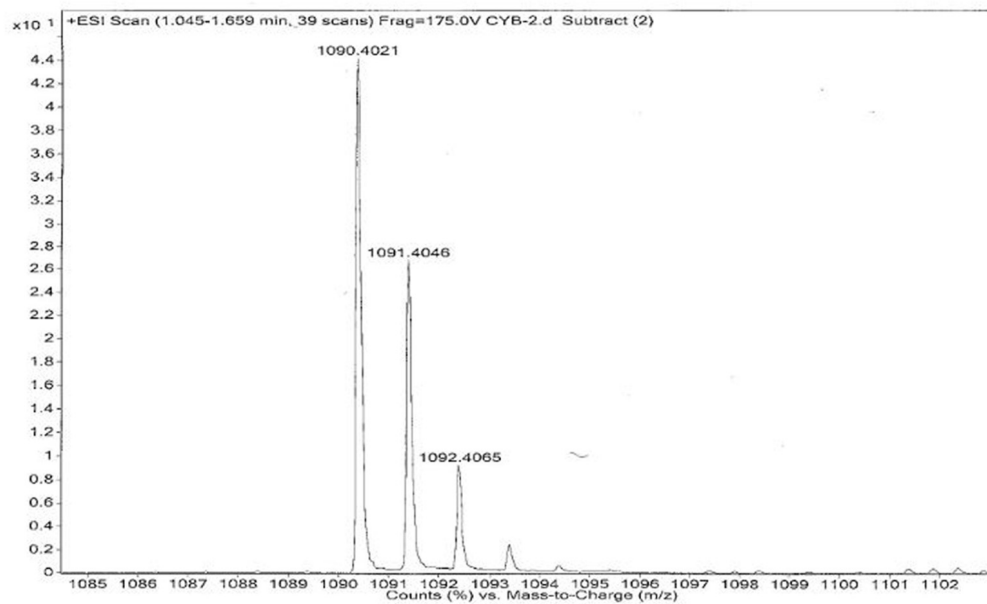

**Figure S-2.**HR-MS of NBD-FFYEEGGH

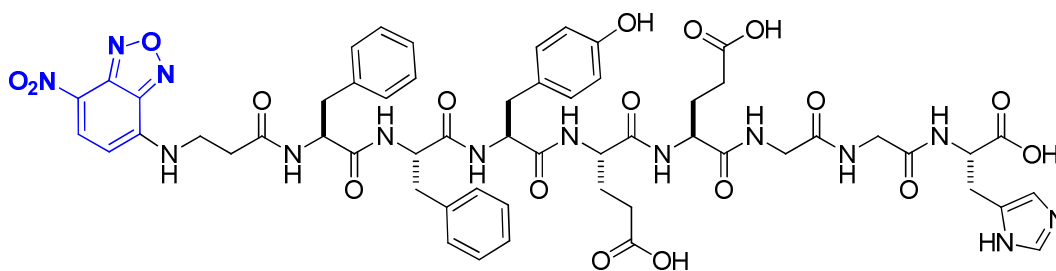

**Compound 2:**NBD-FFYEEGGH

**Scheme S-3.** Chemical structure of NBD-FFYEEGGH

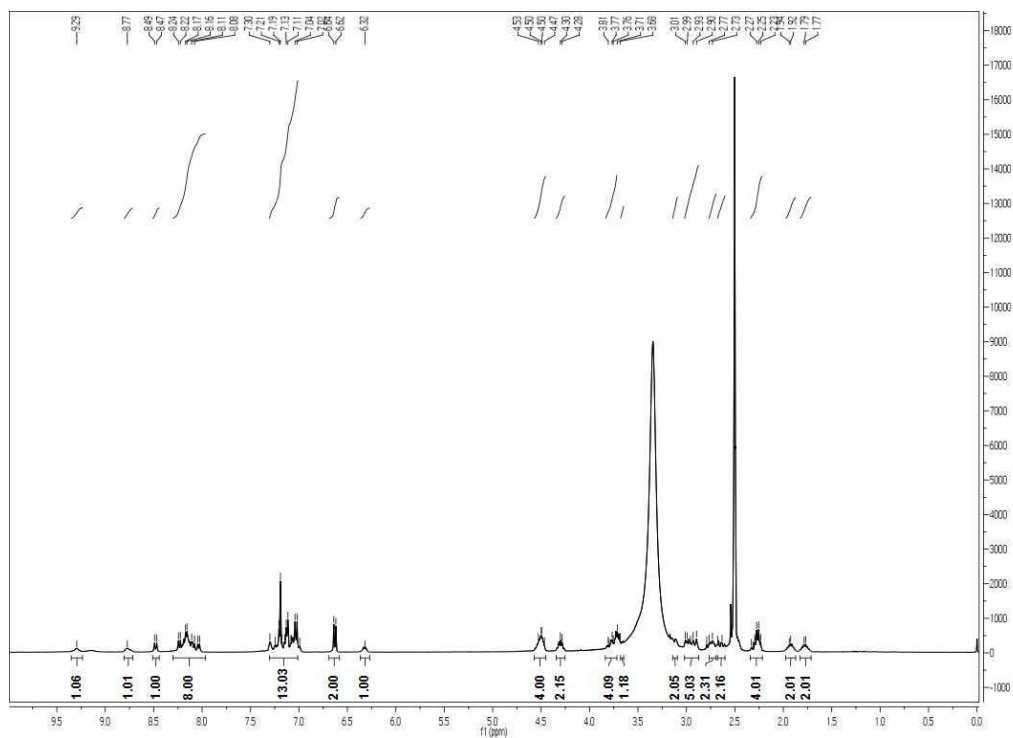

**Figure S-3.**  $^1\text{H}$ -NMR of NBD-FFYEEGGH

|               |                   |             |           |                 |              |                        |                      |
|---------------|-------------------|-------------|-----------|-----------------|--------------|------------------------|----------------------|
| Sample Name   | IC/ms             | Position    | P1-A2     | Instrument Name | Instrument 1 | User Name              |                      |
| Inj Vol       | 3                 | InjPosition |           | SampleType      | Sample       | IRM Calibration Status | Some Ions Missed     |
| Data Filename | NBD-B-AFFYEEGGH.d | ACQ Method  | chen-ms.m | Comment         |              | Acquired Time          | 7/4/2013 10:03:10 AM |

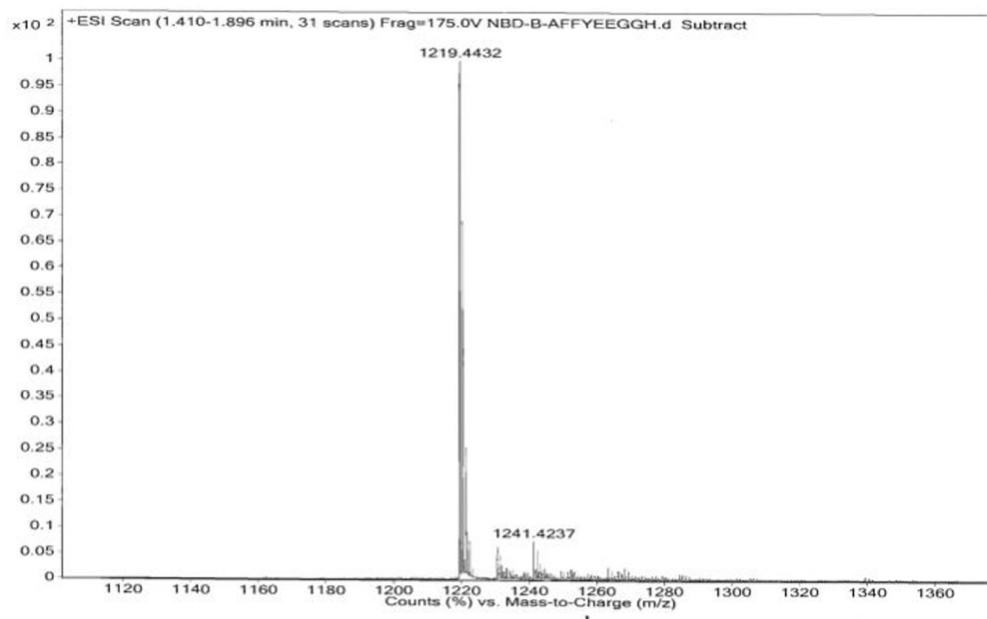

**Figure S-4.** HR-MS of NBD-FFYEEGGH

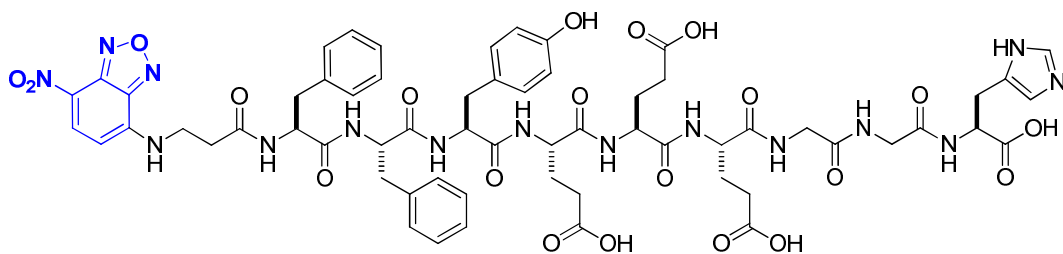

**Compound 3:**NBD-FFYEEEGGH

*Scheme S-4.* Chemical structure of NBD-FFYEEEGGH

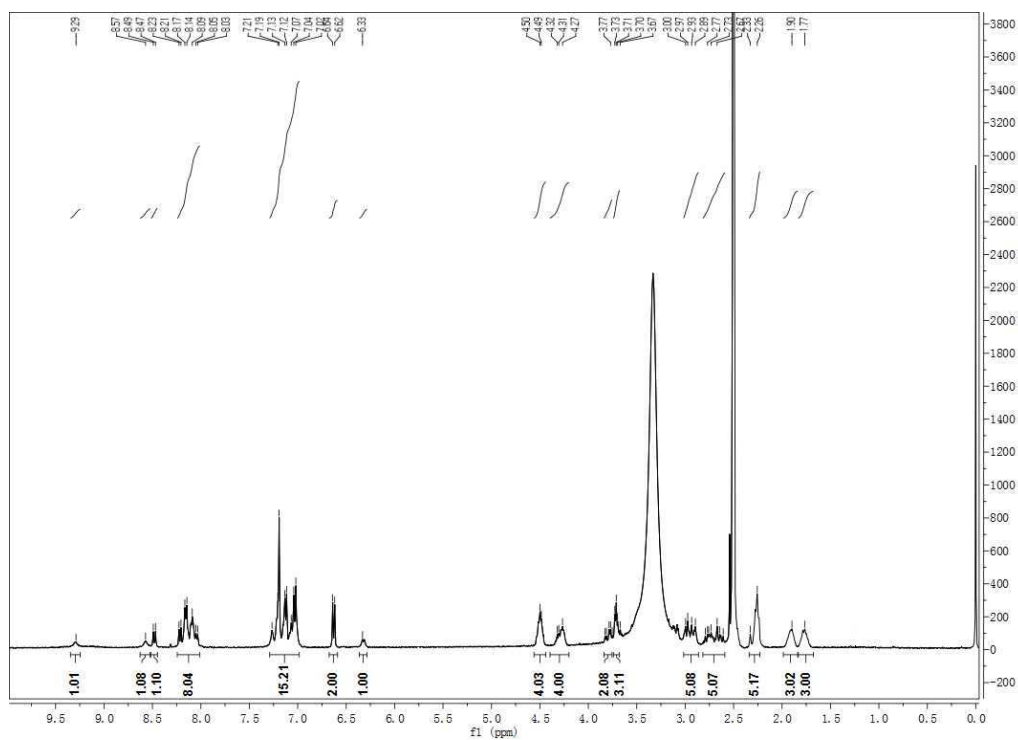

*Figure S-5.*  $^1\text{H}$ -NMR of NBD-FFYEEEGGH

|               |         |             |           |                 |              |                        |                        |
|---------------|---------|-------------|-----------|-----------------|--------------|------------------------|------------------------|
| Sample Name   | lc/ms   | Position    | P1-A5     | Instrument Name | Instrument 1 | User Name              |                        |
| Inj Vol       | 2       | InjPosition |           | SampleType      | Sample       | IRM Calibration Status | Some Ions Missed       |
| Data Filename | CYB-3.d | ACQ Method  | chen-ms.m | Comment         |              | Acquired Time          | 10/18/2013 11:02:03 AM |

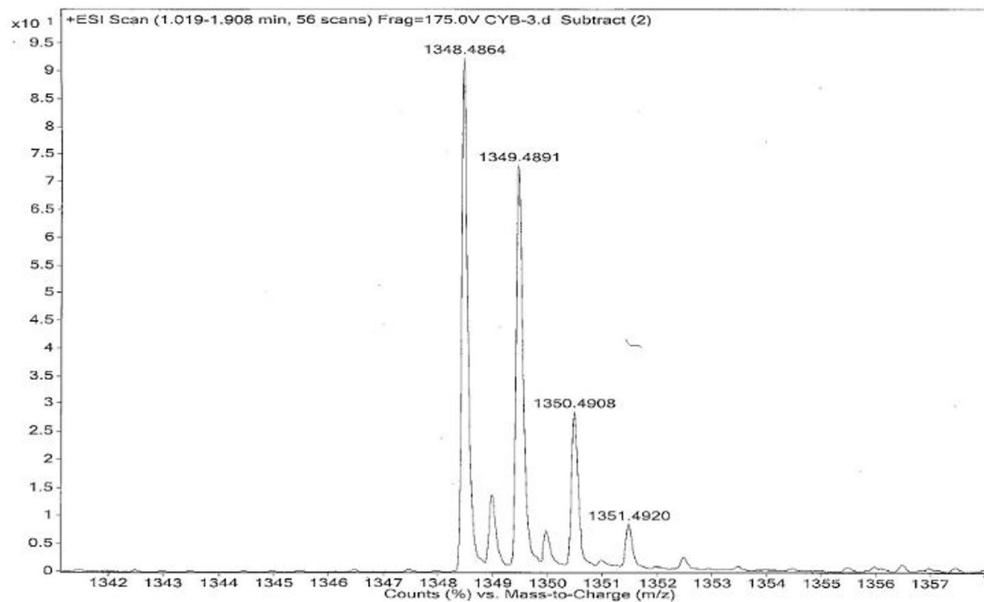

Figure S-6.HR-MS of NBD-FFYEEGGH

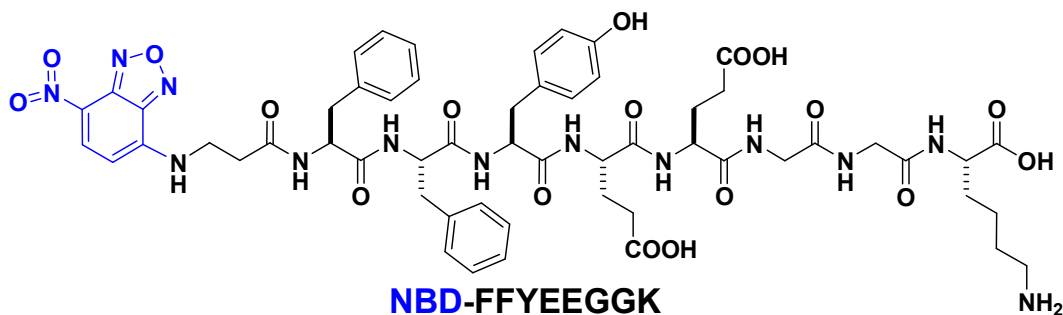

Scheme S-5. Chemical structure of NBD-FFYEEGGK

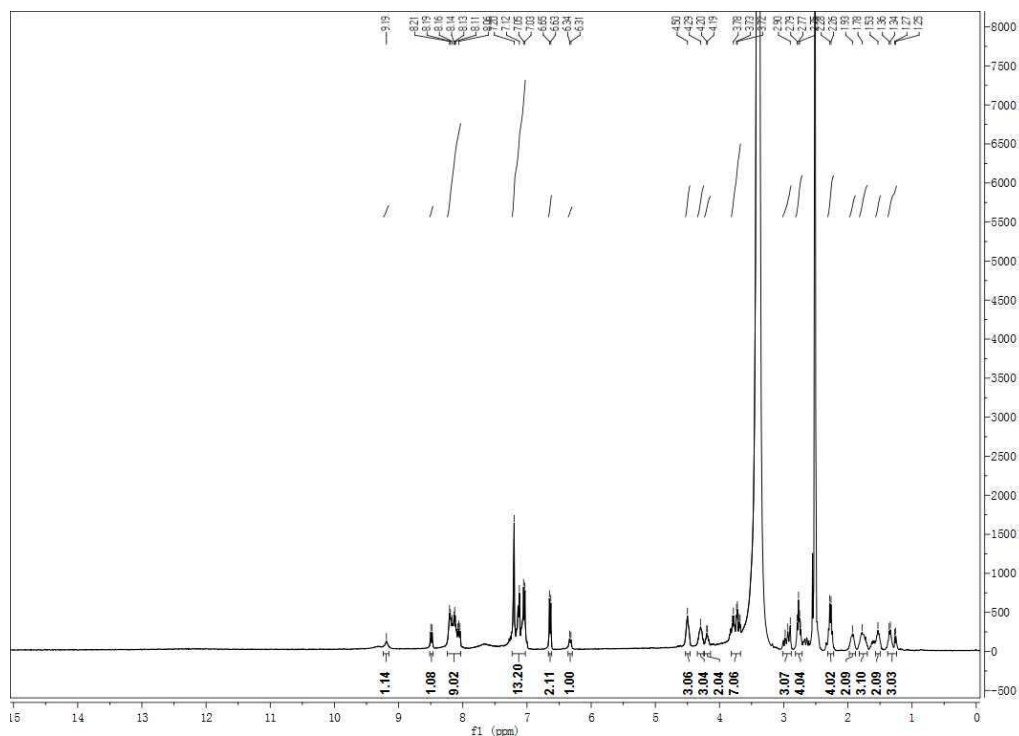

**Figure S-7.**  $^1\text{H}$ -NMR of NBD-FFYEEGGK

|               |                |             |           |                 |              |                        |                      |
|---------------|----------------|-------------|-----------|-----------------|--------------|------------------------|----------------------|
| Sample Name   | lc/ms          | Position    | P1-A3     | Instrument Name | Instrument 1 | User Name              |                      |
| Inj Vol       | 2              | InjPosition |           | SampleType      | Sample       | IRM Calibration Status | Some Ions Missed     |
| Data Filename | NBD-FFYEEGGK.d | ACQ Method  | chen-ms.m | Comment         |              | Acquired Time          | 9/6/2013 10:02:38 AM |

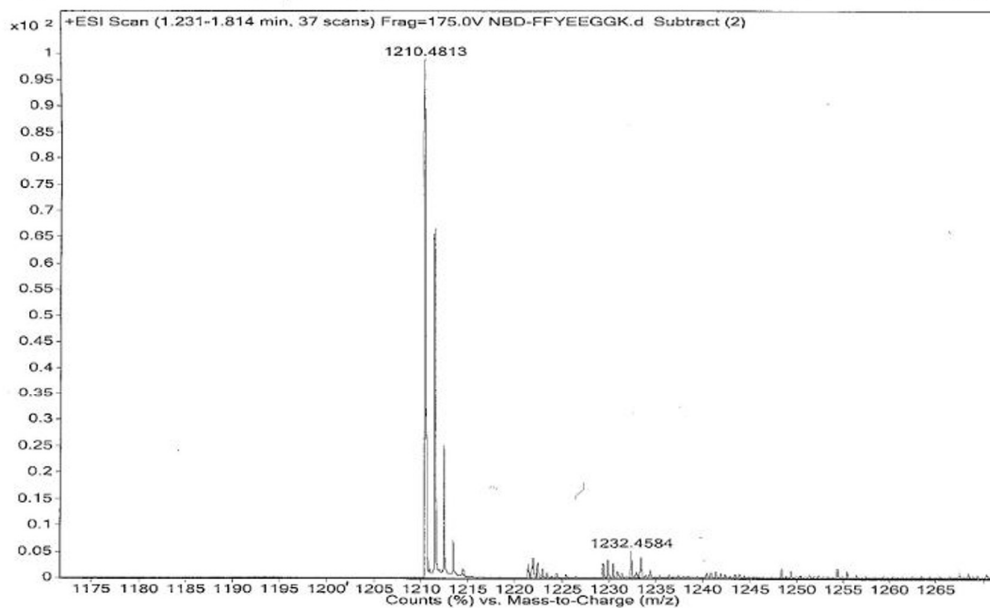

**Figure S-8.** HR-MS of NBD-FFYEEGGK

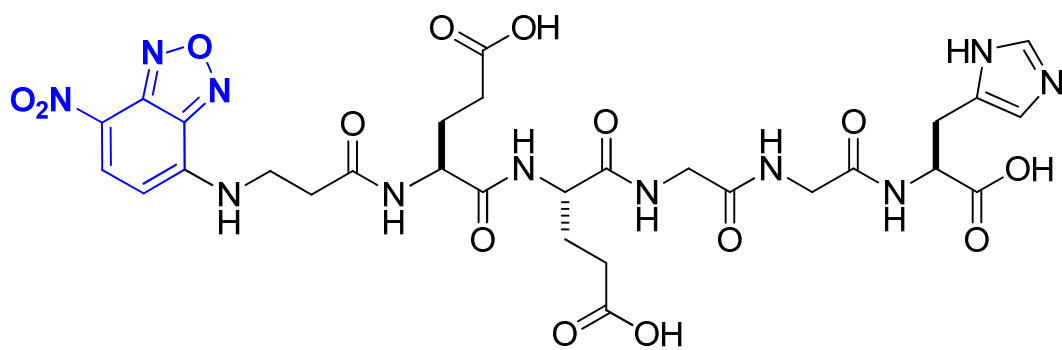

**Compound 4 :NBD-EEGGH**

*Scheme S-6.* Chemical structure of NBD-EEGGH

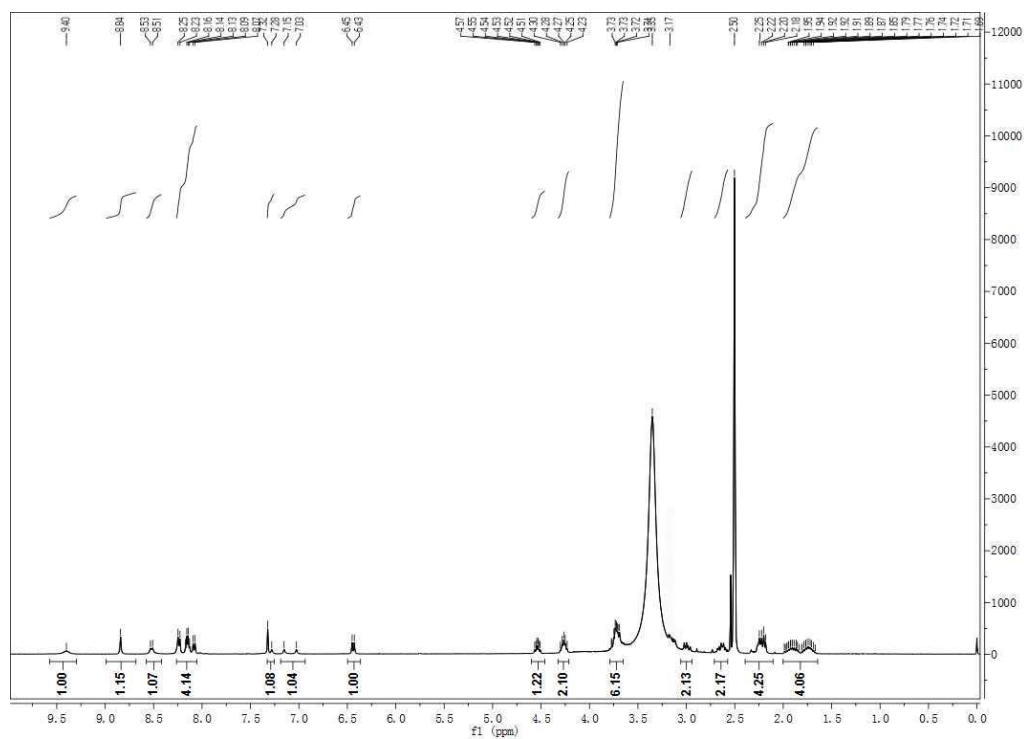

**Figure S-9.**  $^1\text{H}$ -NMR of NBD-EEGGH



|               |         |             |           |                 |              |                        |                        |
|---------------|---------|-------------|-----------|-----------------|--------------|------------------------|------------------------|
| Sample Name   | lc/ms   | Position    | P1-A6     | Instrument Name | Instrument 1 | User Name              |                        |
| Inj Vol       | 2       | InjPosition |           | SampleType      | Sample       | IRM Calibration Status | Some Ions Missed       |
| Data Filename | CYB-4.d | ACQ Method  | chen-ms.m | Comment         |              | Acquired Time          | 10/18/2013 11:05:48 AM |

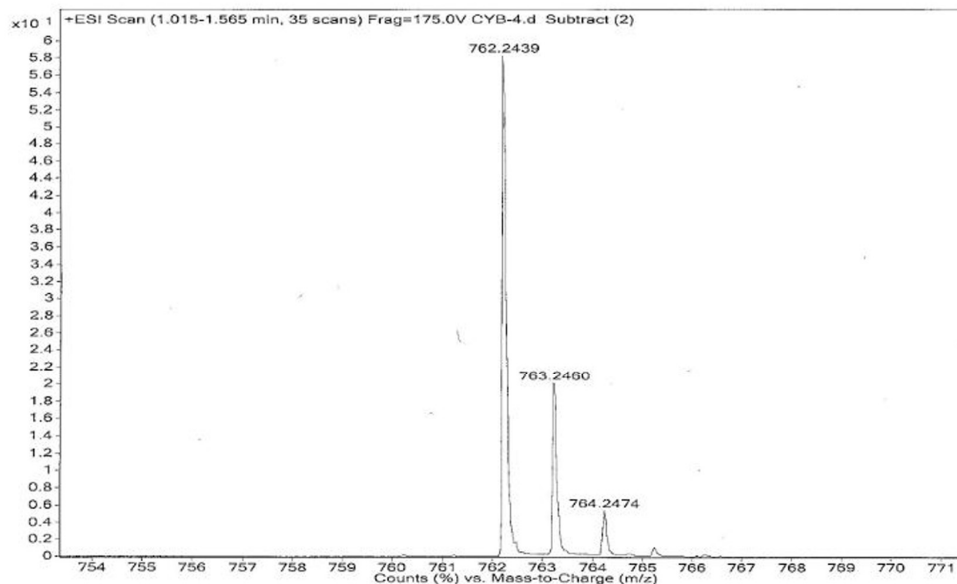

**Figure S-10.** HR-MS of NBD-EEGGH

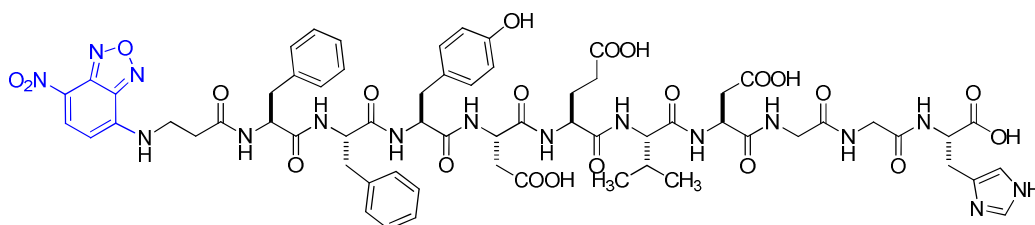

**Compound 5:** NBD-FFFDEVDGGH

**Scheme S-7.** Chemical structure of NBD-FFFDEVDGGH

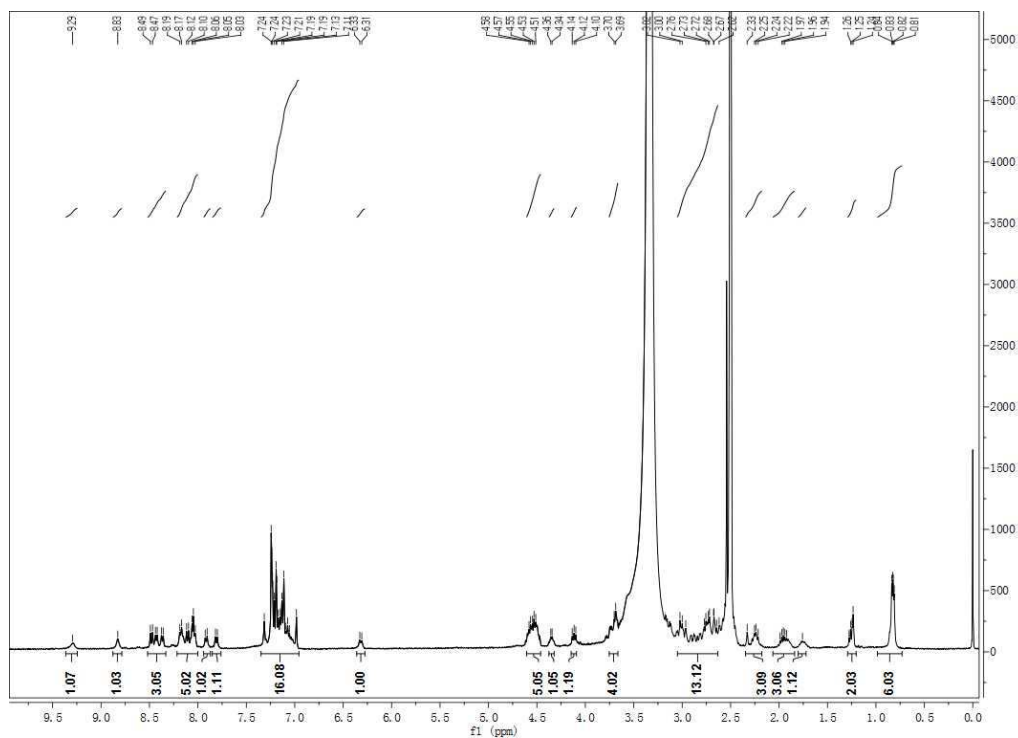

**Figure S-11.**  $^1\text{H}$ -NMR of NBD-FFFDEVDGGH

|               |         |             |            |                 |              |                        |                        |
|---------------|---------|-------------|------------|-----------------|--------------|------------------------|------------------------|
| Sample Name   | lc/ms   | Position    | P1-A3      | Instrument Name | Instrument 1 | User Name              |                        |
| Inj Vol       | 2       | InjPosition |            | SampleType      | Sample       | IRM Calibration Status | Some Ions Missed       |
| Data Filename | CYB-1.d | ACQ Method  | chem-ms.ms | Comment         |              | Acquired Time          | 10/18/2013 10:54:29 AM |

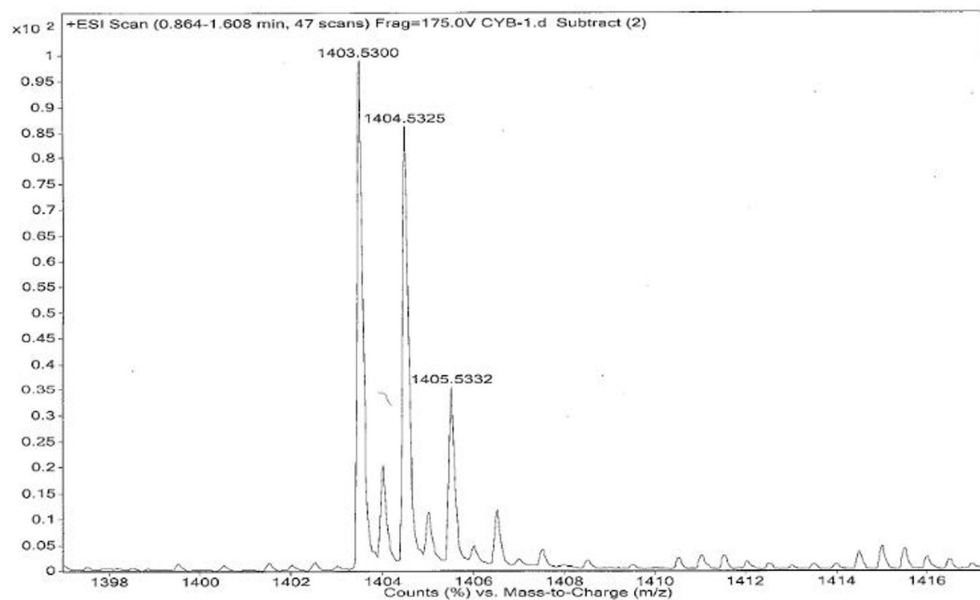

**Figure S-12.** HR-MS of NBD-FFFDEVDGGH

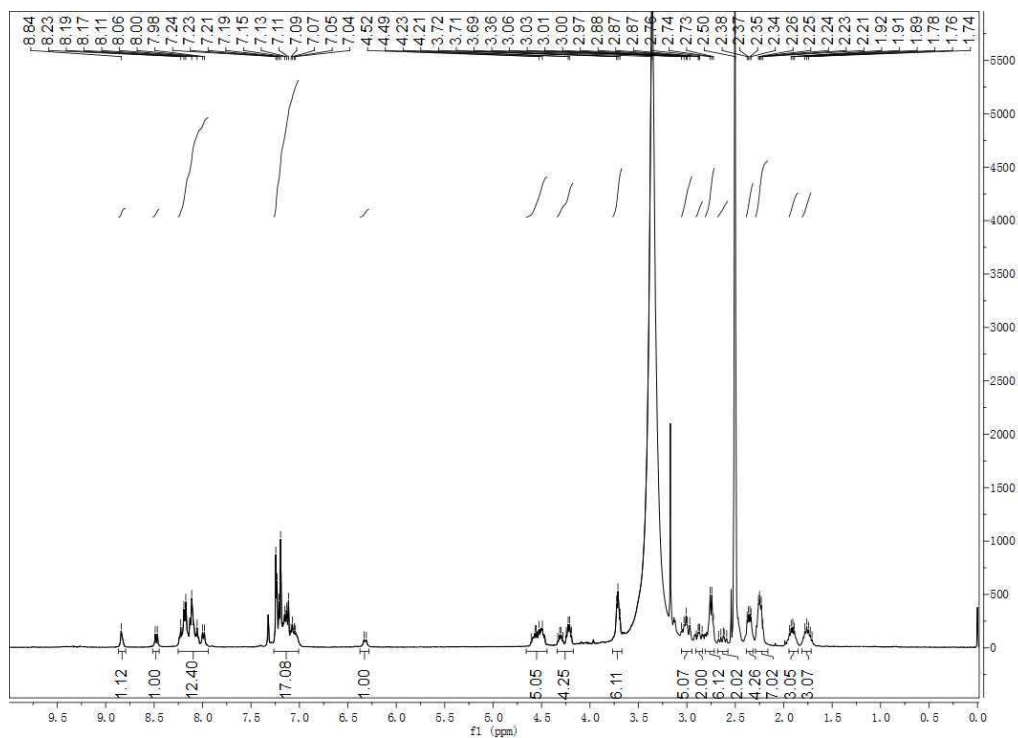

**Figure S-13.**  $^1\text{H}$ -NMR of NBD-FFFE-ss-EGGH

| Sample Name   | IC/MS              | Position    | P1-A2     | Instrument Name | Instrument 1 | User Name              |
|---------------|--------------------|-------------|-----------|-----------------|--------------|------------------------|
| Inj Vol       | 2                  | InjPosition |           | SampleType      | Sample       | IRM Calibration Status |
| Data Filename | NBD-FFFE-SS-EGGH.d | ACQ Method  | chen-ms.m | Comment         |              | Acquired Time          |

Some Ions Missed  
9/6/2013 9:58:51 AM

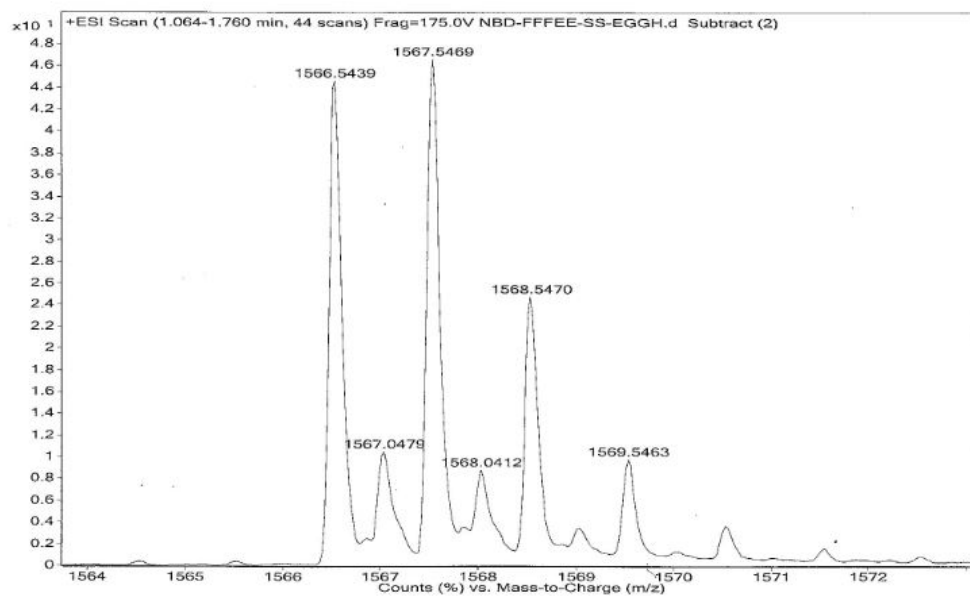

**Figure S-14.** HR-MS of NBD-FFFE-ss-EGGH

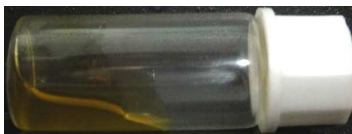

**Figure S-15.** An optical image of water solution of NBD-FFYEEGGK with 1 equiv. of  $\text{Cu}^{2+}$

**Hydrogelation test of 2 by adding different metal ions:** To a water solution of **2** (1.0 wt%, pH = 7.4, adjusted by  $\text{Na}_2\text{CO}_3$ ), an equal volume of water solution containing 1 equiv. of different kinds of metal ions ( $\text{Cu}^{2+}$ ,  $\text{Mn}^{2+}$ ,  $\text{Ni}^{2+}$ ,  $\text{Co}^{2+}$ ,  $\text{Fe}^{2+}$ ,  $\text{Zn}^{2+}$ ,  $\text{Ca}^{2+}$ ,  $\text{Sr}^{2+}$ ,  $\text{Ba}^{2+}$ ,  $\text{Na}^+$ , and  $\text{K}^+$ ) was added (pH = 7.4). The hydrogelation could only be observed for  $\text{Cu}^{2+}$ .

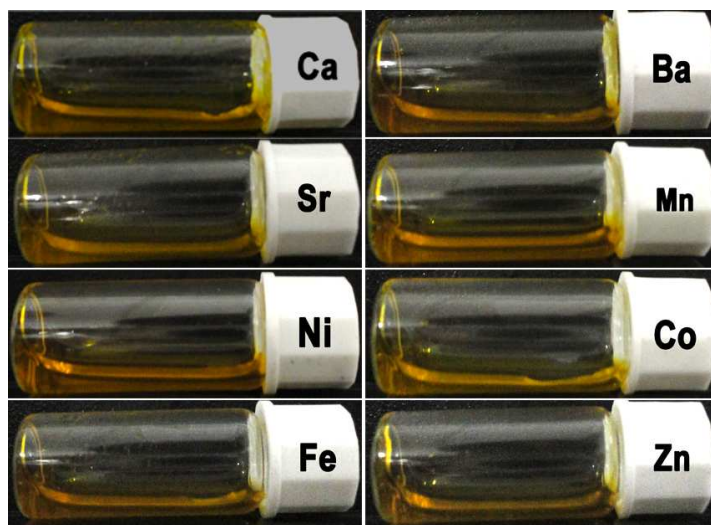

**Figure S-16.** Optical images of water solution of **2** with 1 equiv. of different metal ions (pH = 7.4)

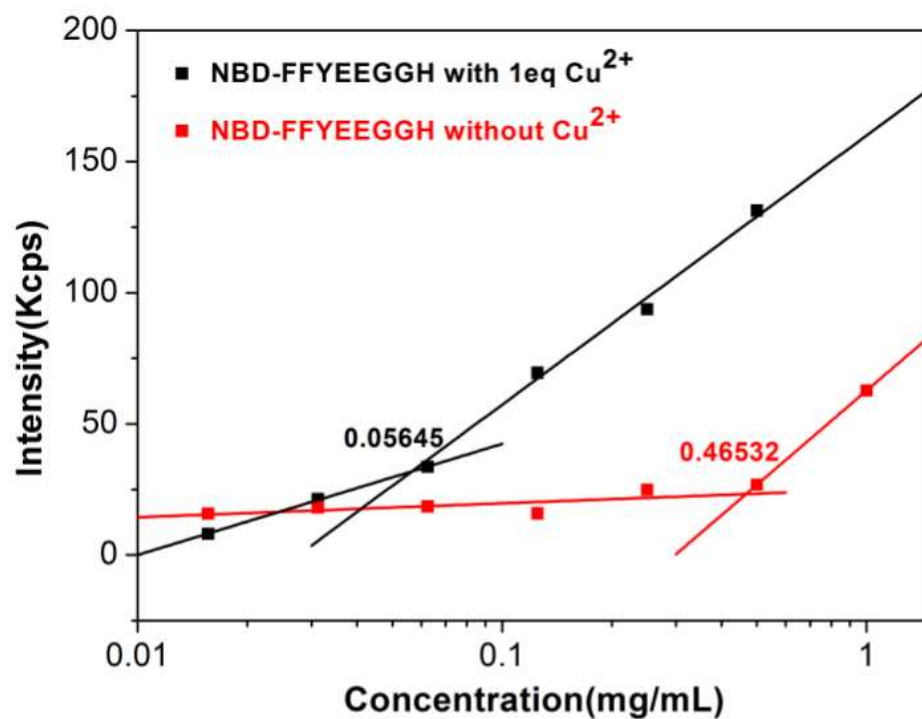

**Figure S-17.** CMC of compound **2** in the absence and presence of 1 equiv. of Cu<sup>2+</sup>

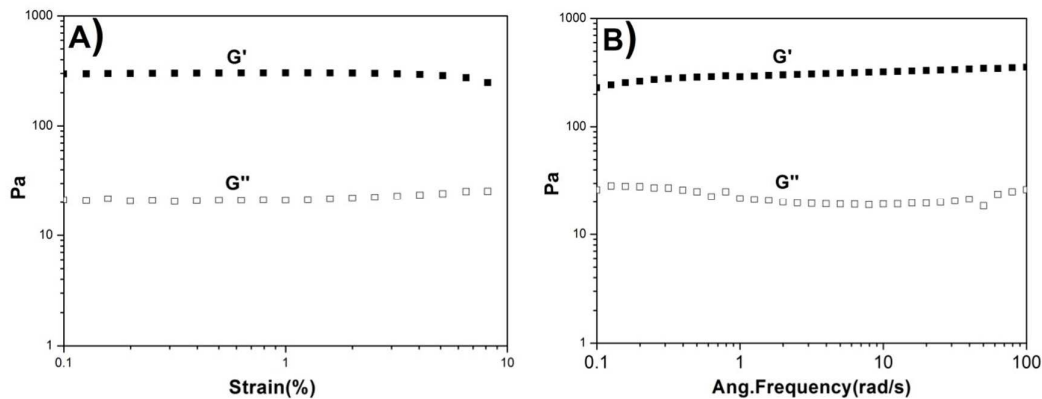

**Figure S-18.** Rheological measurements A) in dynamic strain sweep mode at the frequency of 1 rad/s and B) in dynamic frequency sweep at the strain of 1% for hydrogel containing 0.5% compound **2** and 1 equiv. of Cu<sup>2+</sup>

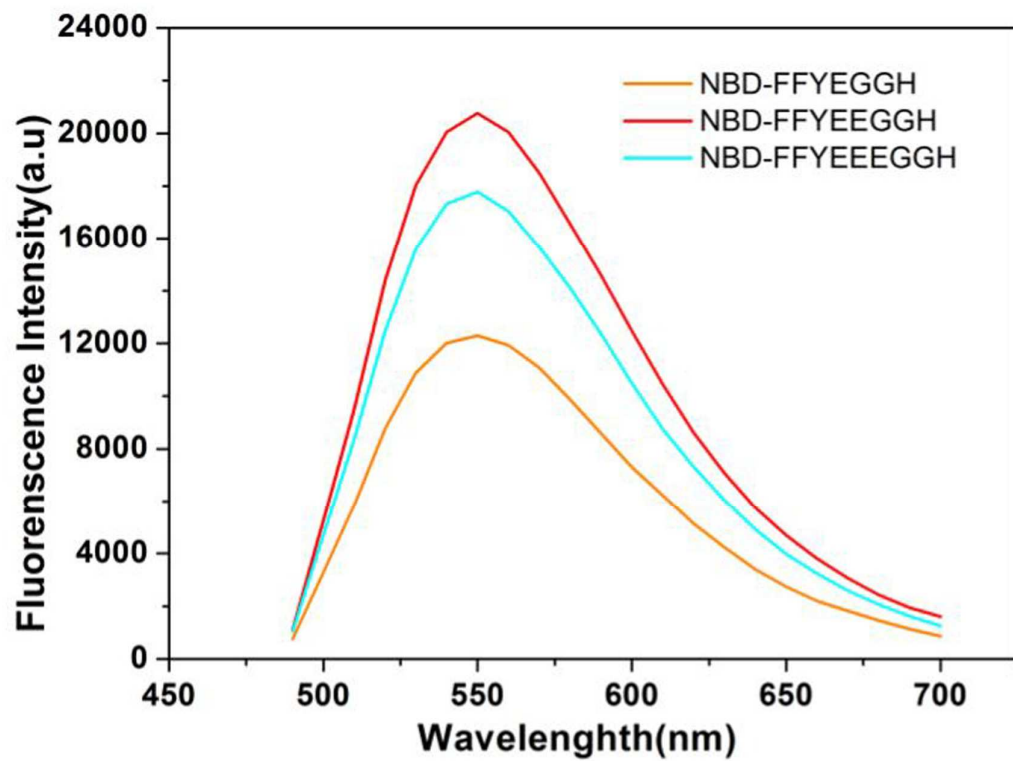

Figure S-19. Fluorescence spectra of aqueous solution containing 0.05 wt% of 1-3.

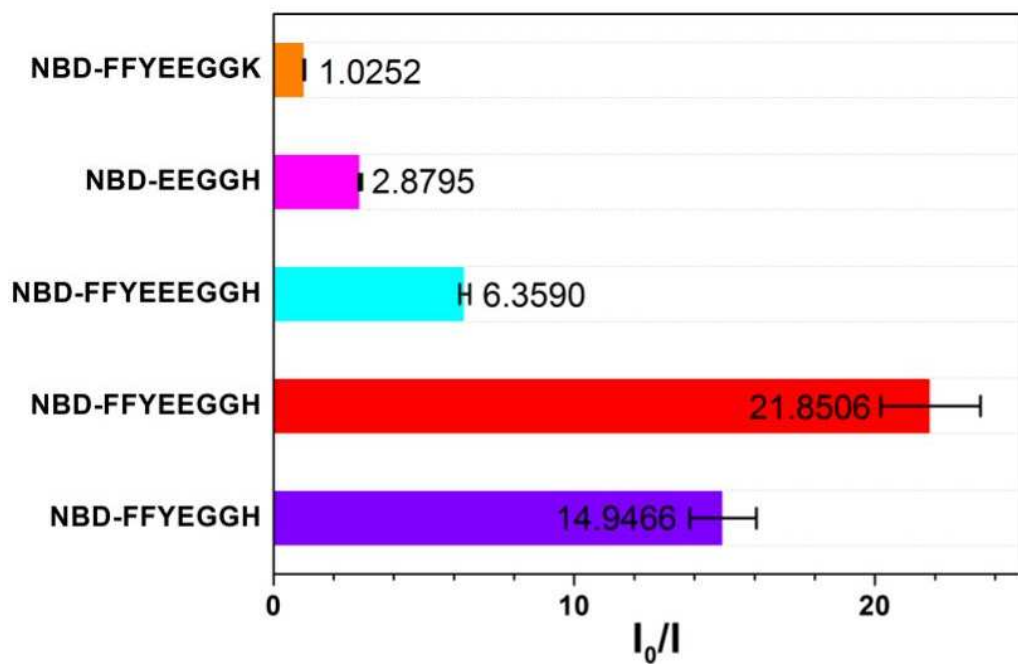

Figure S-20.  $I_0/I$  value of different compounds ( the data were expressed as the mean  $\pm$  standard error of the mean (SEM, N = 3))

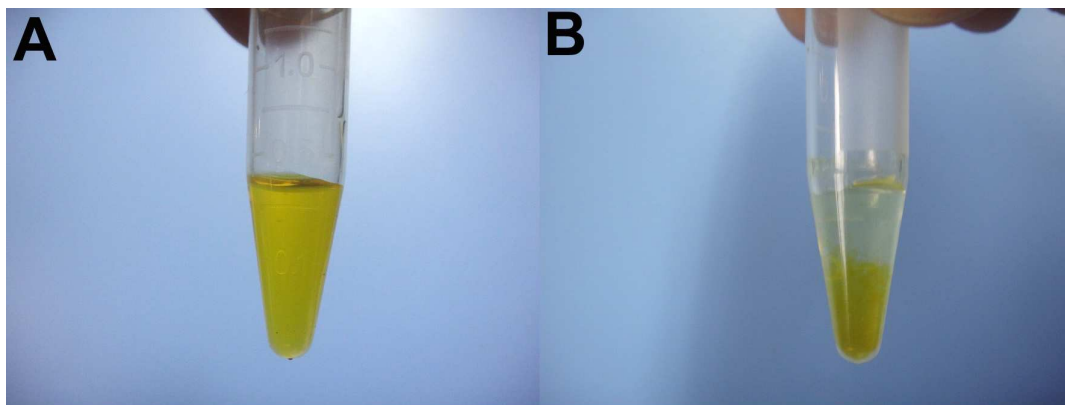

**Figure S-21.** Optical images of solutions of compound **1** with or without  $\text{Cu}^{2+}$ : A) 0.5 wt% of compound **1** without  $\text{Cu}^{2+}$ ; B) 0.5 wt% of compound **1** with one equiv. of  $\text{Cu}^{2+}$

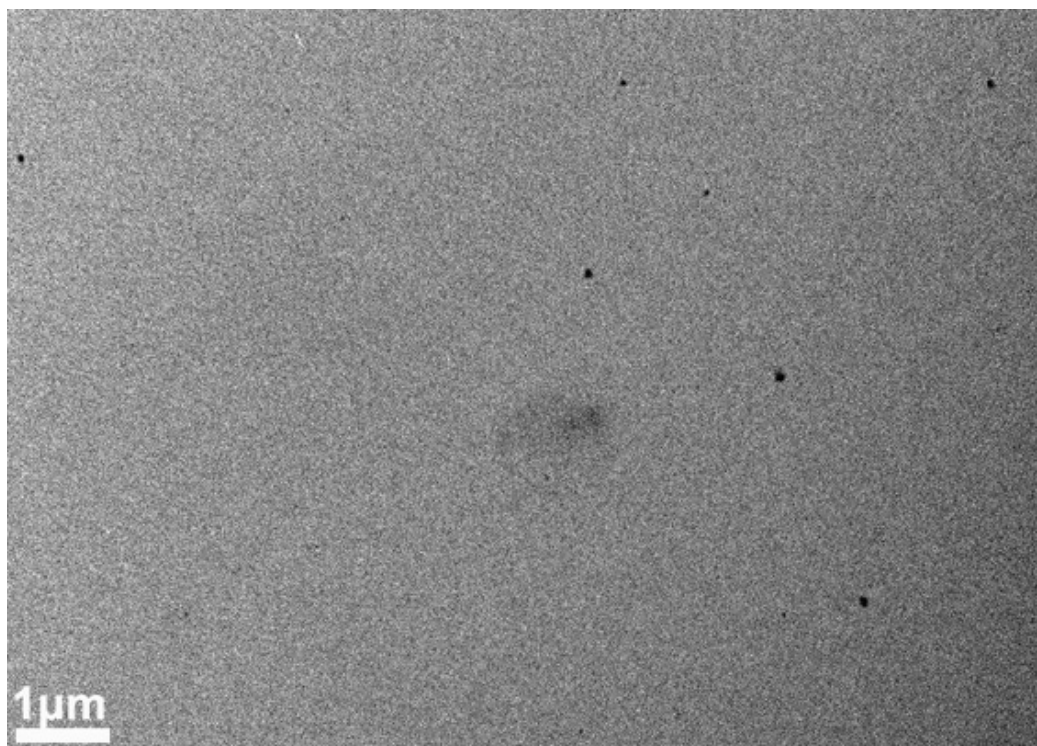

**Figure S-22.** Transmission electron microscopy (TEM) images of solution of **4** with one equiv. of  $\text{Cu}^{2+}$



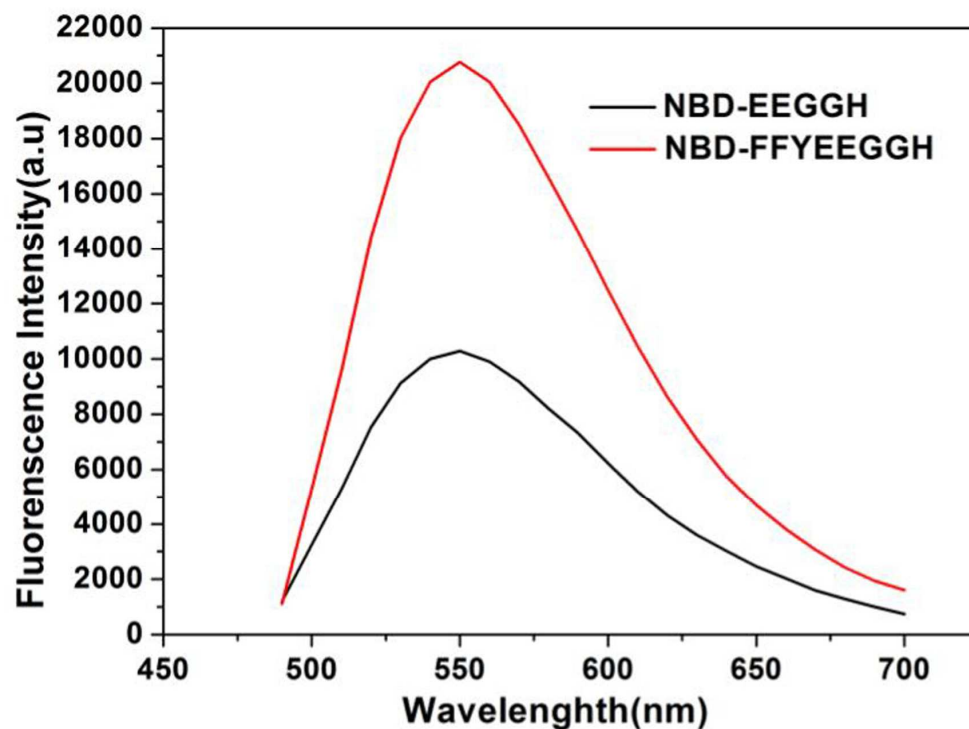

**Figure S-23.** Fluorescence spectra of aqueous solution containing compound **2** or compound **4** (410  $\mu$ M, pH = 7.4)

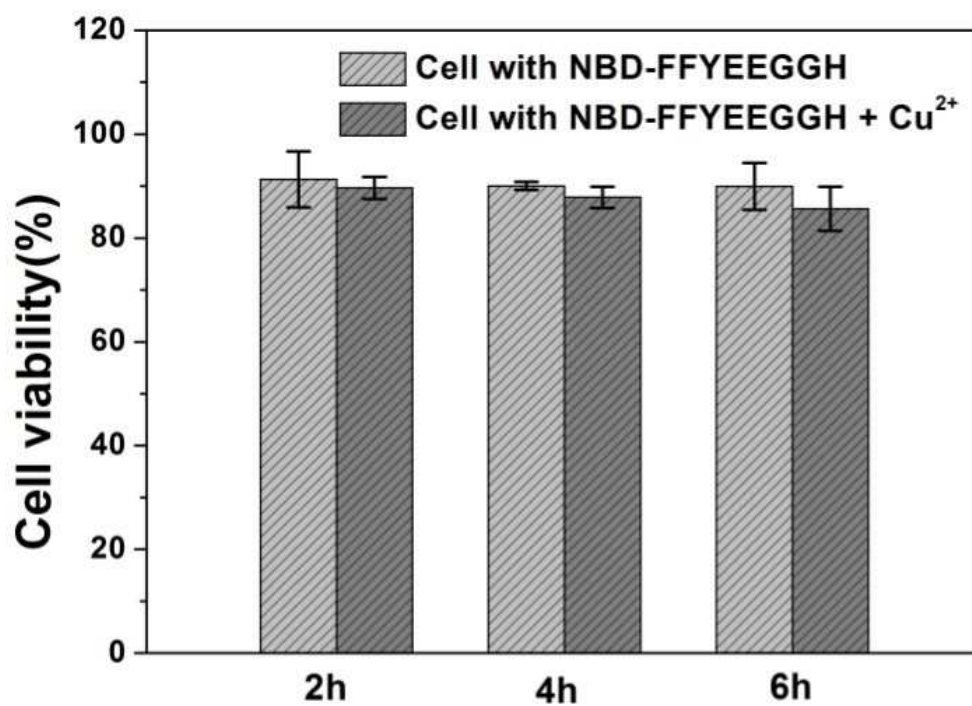

**Figure S-24.** Cell viability of Compounds **2** with 100  $\mu$ M  $\text{Cu}^{2+}$  by MTT assay for 2 to 6 h (the data were expressed as the mean  $\pm$  standard error of the mean (SEM, N = 3))



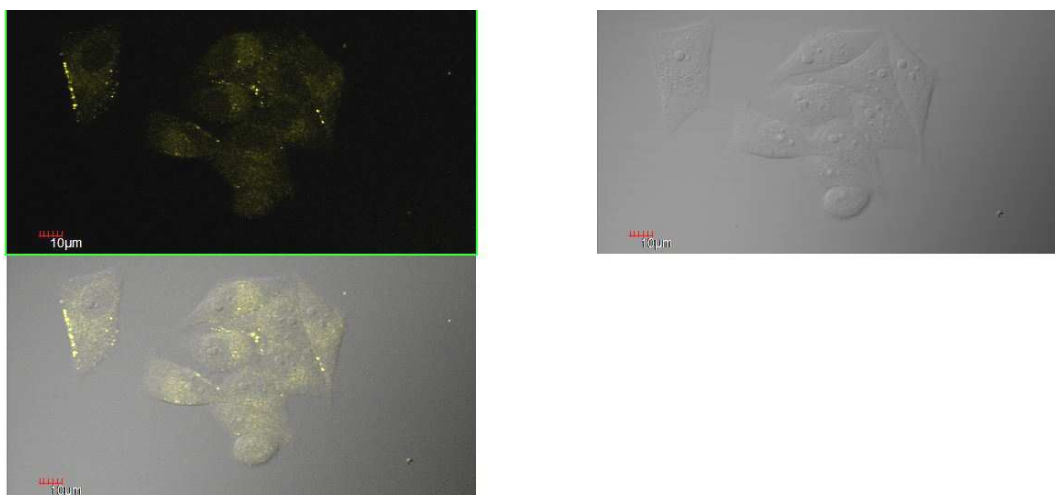

**Figure S-25.** Confocal images of HeLa cells treated with **2** (0.05 wt%) at 2 h time point (top left: fluorescence image, top right: bright field image, and down: overlay image)

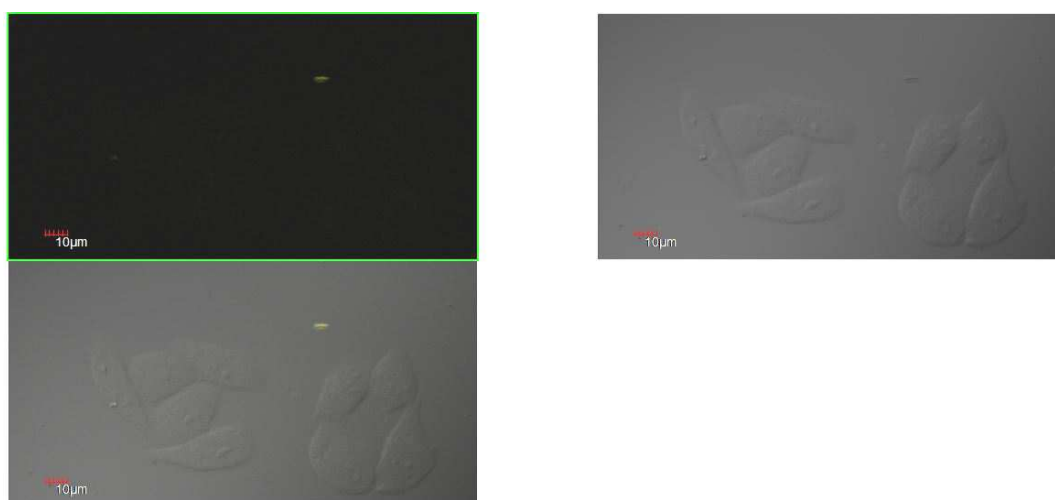

**Figure S-26.** Confocal images of HeLa cells pre-treated with 100 µM of  $\text{Cu}^{2+}$  and then treated with **2** (0.05 wt%) at 6 h time point (top left: fluorescence image, top right: bright field image, and down: overlay image)

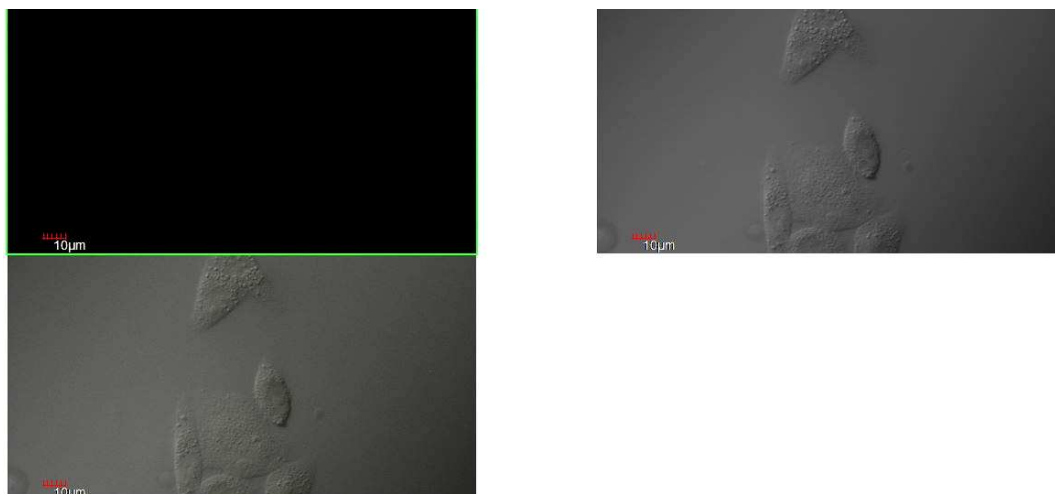

**Figure S-27.** Confocal images of HeLa cells treated with **2** (0.05 wt%) for 2h and then treated with 100  $\mu\text{M}$  of  $\text{Cu}^{2+}$  for another 2h (top left: fluorescence image, top right: bright field image, and down: overlay image)

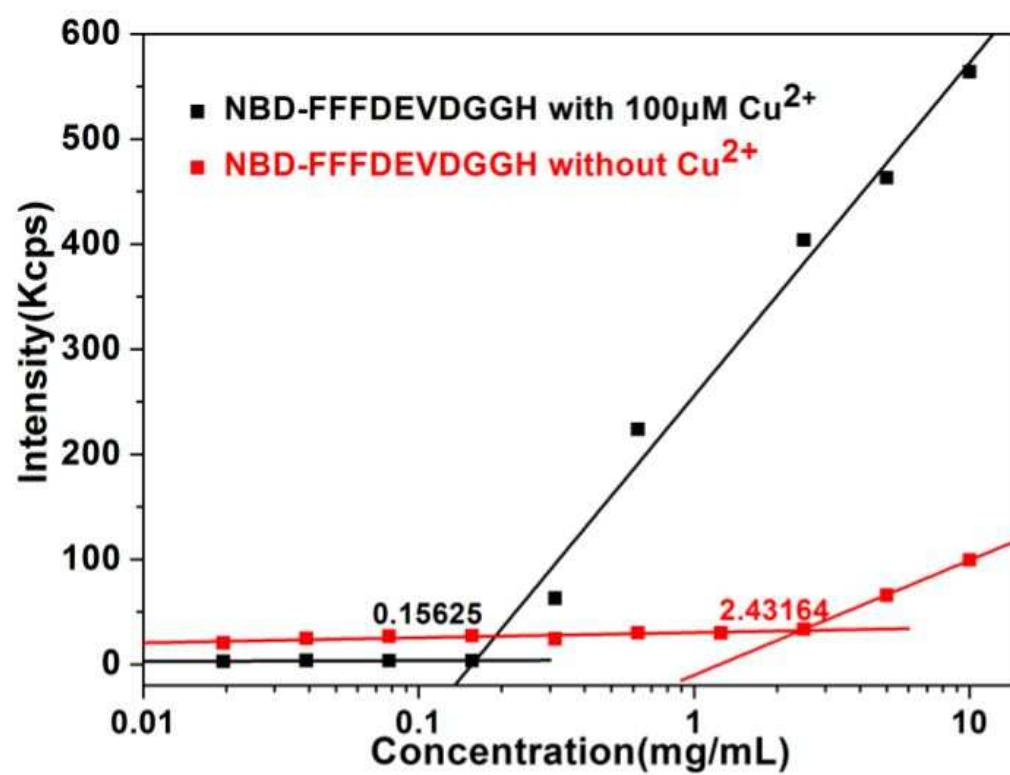

**Figure S-28.** CMC of compound **4** in the absence and presence of 100  $\mu\text{M}$  of  $\text{Cu}^{2+}$

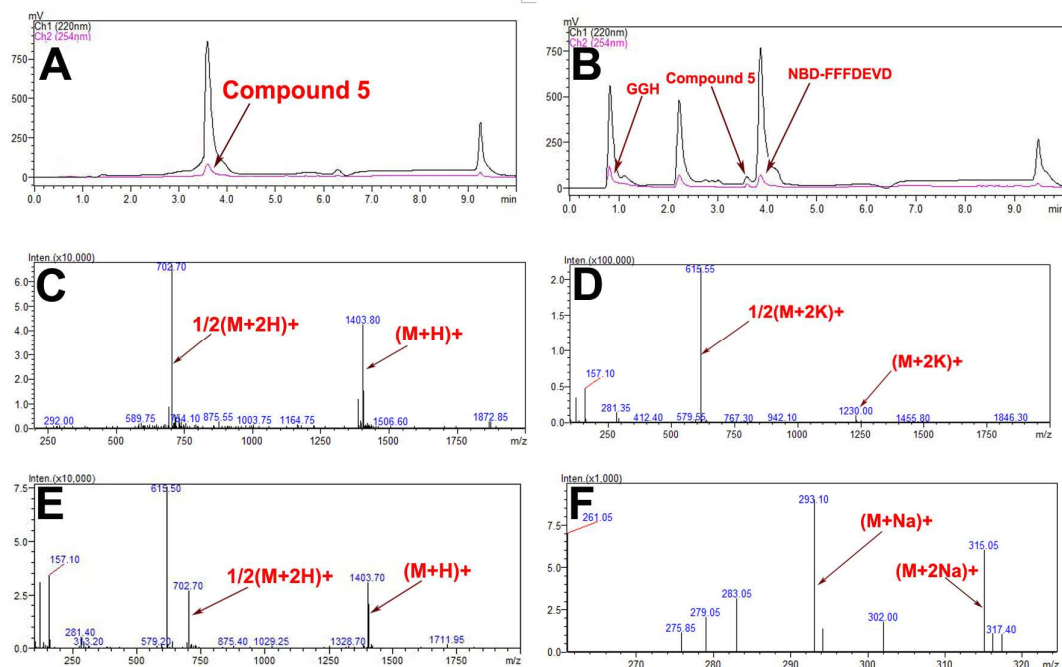

**Figure S-29.** A) HPLC of compound **5** ; B) HPLC of compound **5** with 1 U/mL caspase-3 for 1 h; C) MS of compound **5** in A); D) MS of NBD-FFFDEVD cleaved from compound **5** by caspase-3 in B); E) MS of compound **5** uncleaved by caspase-3 in B); F) MS of GGH cleaved from compound **5** by caspase-3 in B).

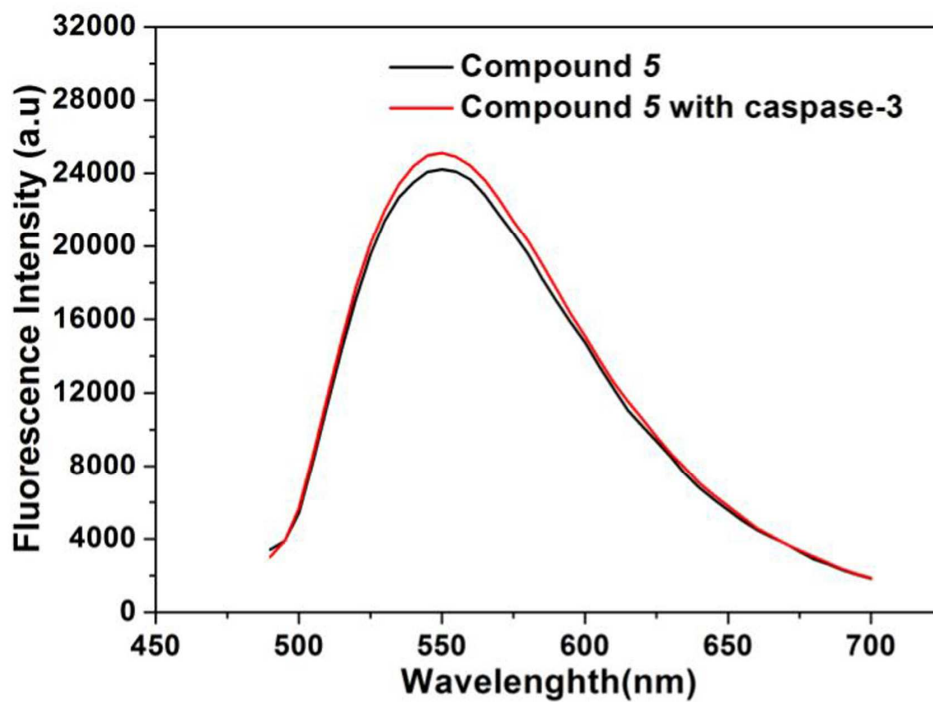

**Figure S-30** Fluorescence spectra of aqueous solution containing compound **5** (0.05 wt% ) before and after adding Caspase-3 in the absence of  $\text{Cu}^{2+}$

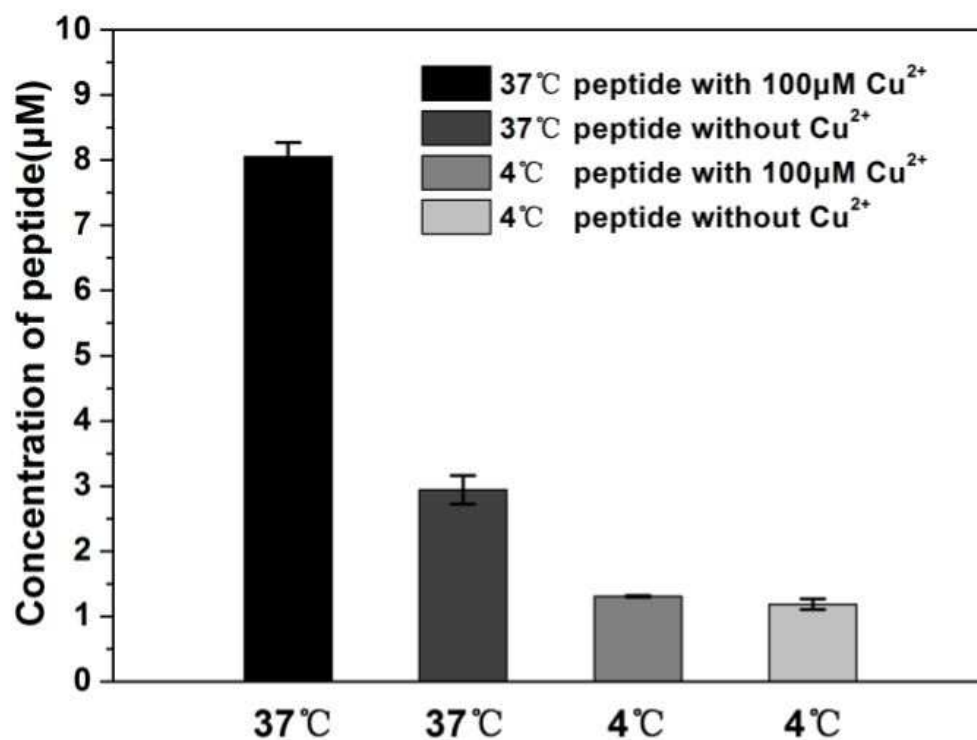

**Figure S-31.** The amount of compound **4** with Cu<sup>2+</sup> and without Cu<sup>2+</sup> within HeLa cells at 4°C and 37 °C determined by LC-MS (the data were expressed as the mean  $\pm$  standard error of the mean (SEM, N = 3))

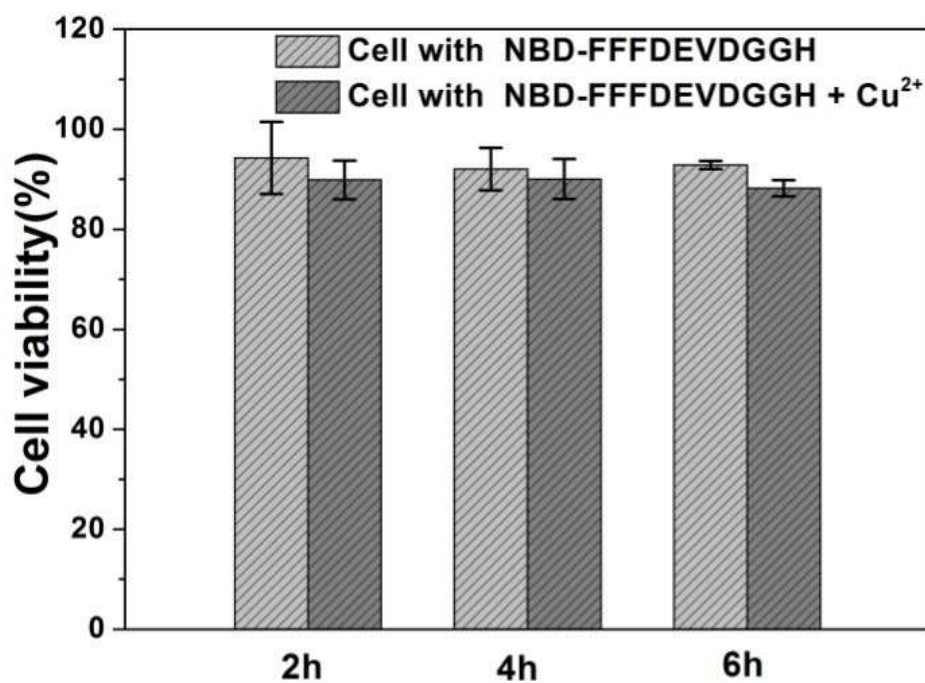

**Figure S-32.** Cell viability of Compound **4** with 100  $\mu\text{M}$   $\text{Cu}^{2+}$  by MTT assay for 2 to 6h (the data were expressed as the mean  $\pm$  standard error of the mean (SEM, N = 3))

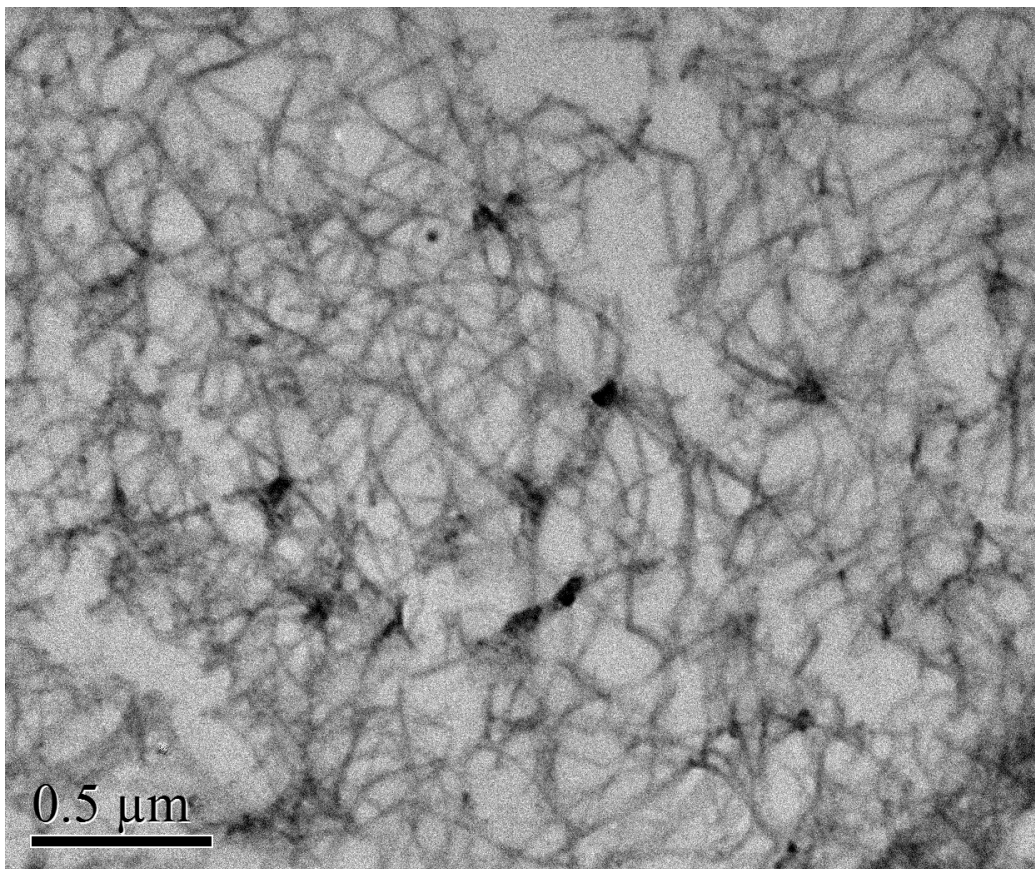

**Figure S-33.** Transmission electron microscopy (TEM) images of solution of **6** with one equiv. of  $\text{Cu}^{2+}$  and 4 equiv. of GSH

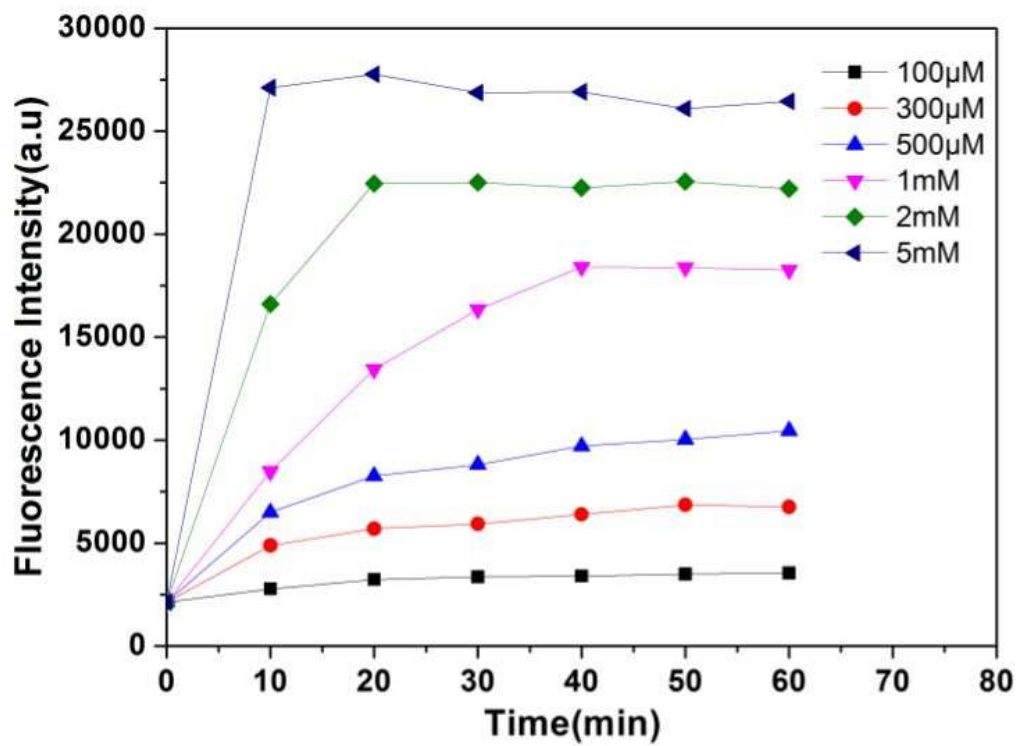

*Figure S-34.* Fluorescence values of **6**:Cu<sup>2+</sup> (0.05 wt% **6** with one equiv. of Cu<sup>2+</sup>) treated with different concentrations of GSH at 0-60mins.

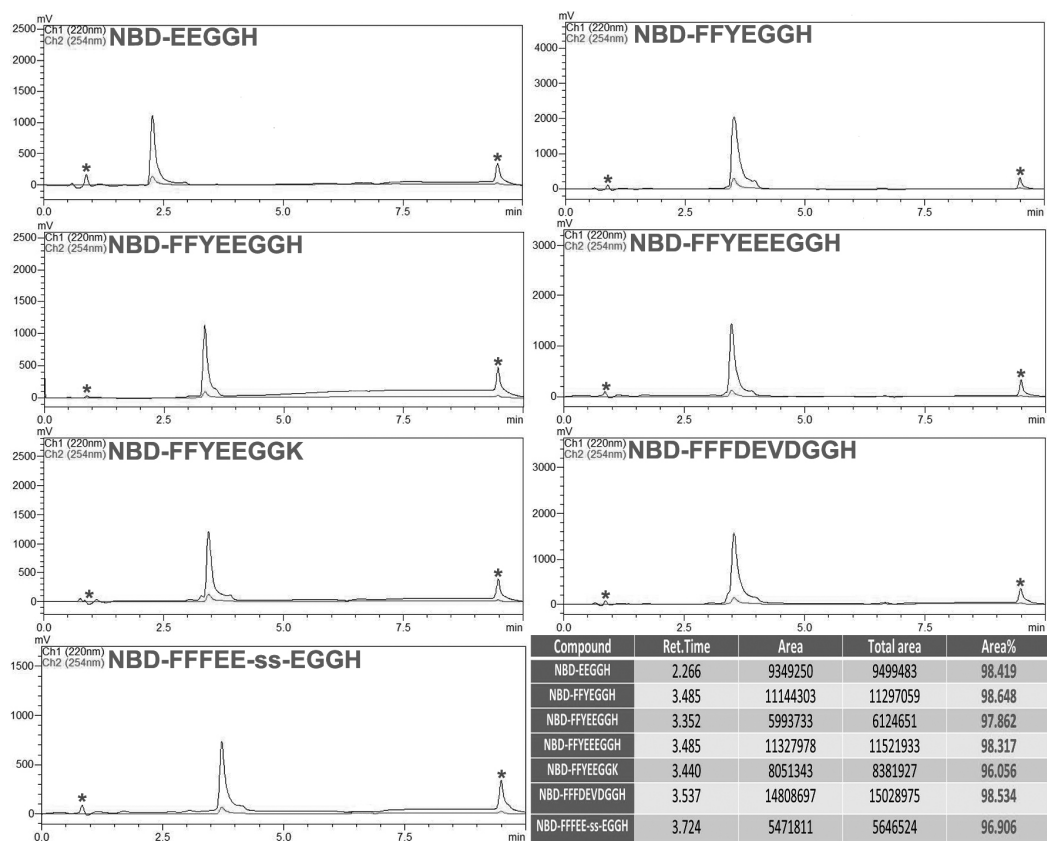

**Figure S-35.** The purity of peptides obtained from LC-MS data (the peaks assigned by \* in every figure are the system peaks).



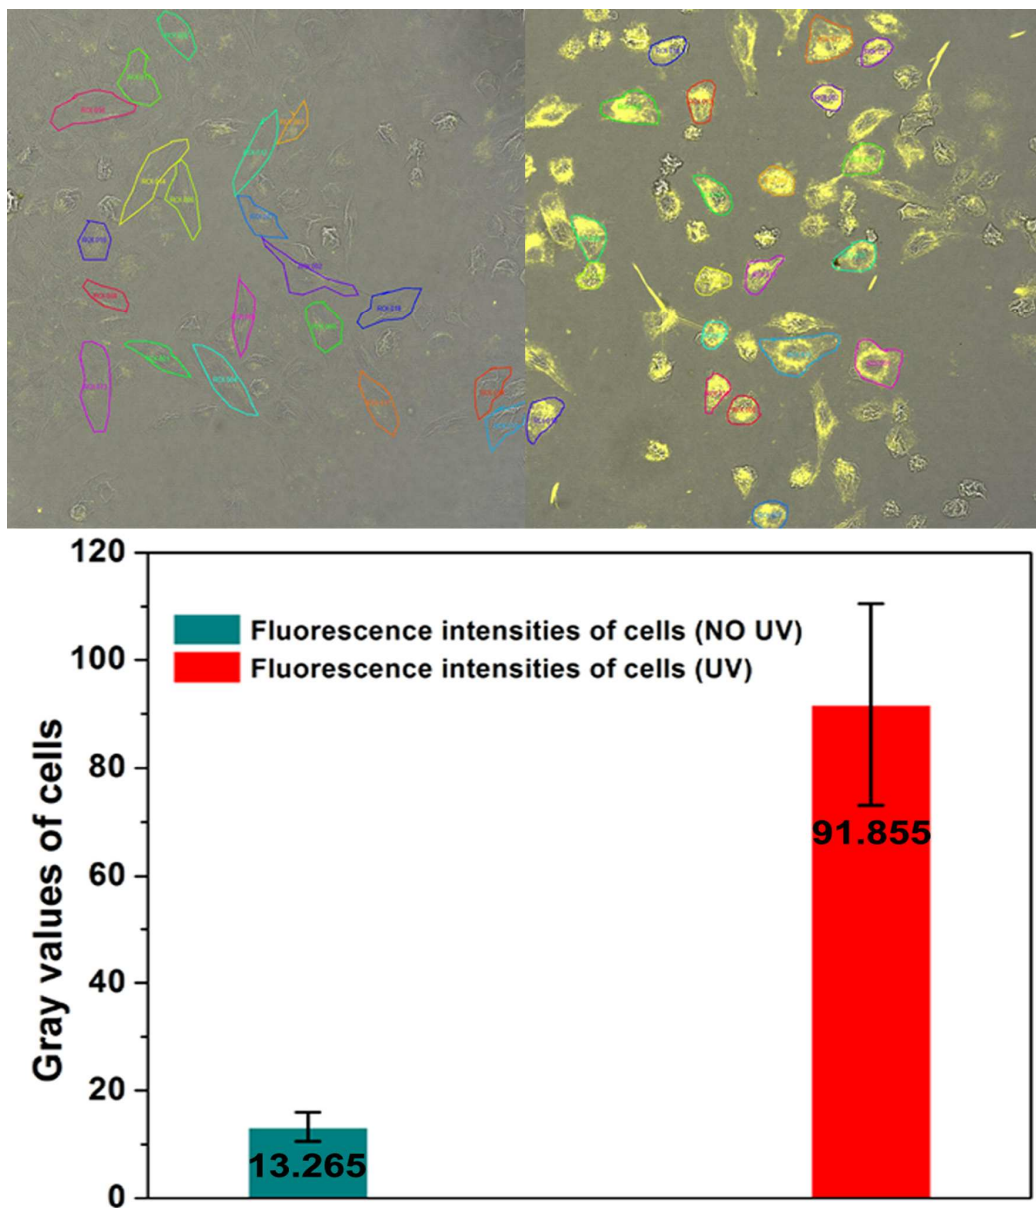

**Figure S-36.** The mean value of fluorescence intensities of cells from CLSM images (the data were expressed as the mean  $\pm$  standard error of the mean (SEM, N = 20)).



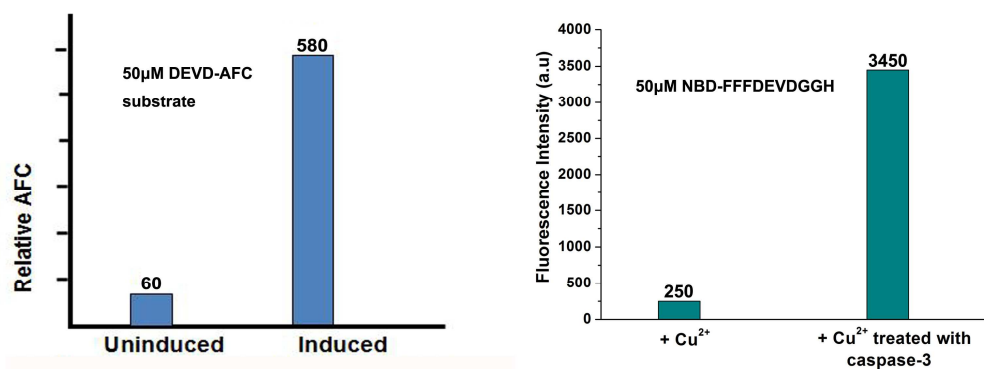

**Figure S-36.** The comparative data of the commercial probe with our probe (left: the change of fluorescence intensity of the commercial probe, the ratio of two histograms= 9.67; right: the change of fluorescence intensity of our probe, the ratio of two histograms=13.8).
